# Supplementary material
Source: publisher figshare collection journal article supplement (https://acs.figshare.com/ndownloader/files/4670491)
Supplement: Supplementary file 1 [file 4670491]

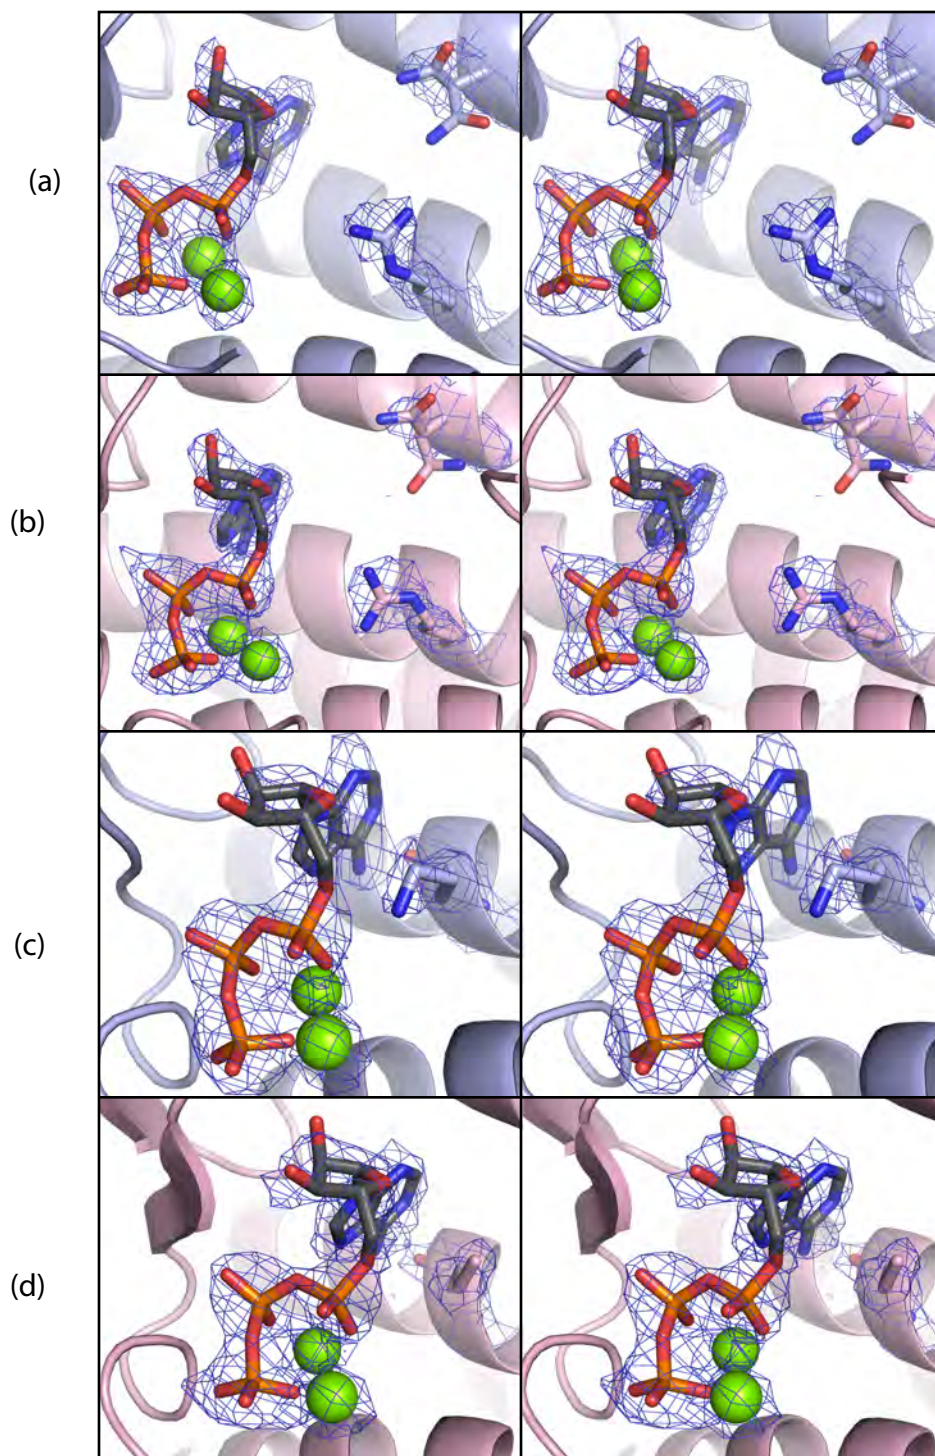

**Supplementary Figure 1.** Representative electron density. (a) *LrPduO*<sup>D35N</sup> monomer A; (b) *LrPduO*<sup>D35N</sup> monomer B; (c) *LrPduO*<sup>R132K</sup> monomer A; (d) *LrPduO*<sup>D35N</sup> monomer B. The  $F_0 - F_C$  electron density omit map for Mg-ATP was contoured at  $3.0 \sigma$  for (a) and (b) and at  $2.0 \sigma$  for (c) and (d). The  $2F_0 - F_C$  electron density maps corresponding to the amino acid side chains were contoured at  $1.0 \sigma$  in all cases. ATP is illustrated in a stick representation with carbon atoms colored in gray.  $Mg^{2+}$  ions are illustrated as green spheres.

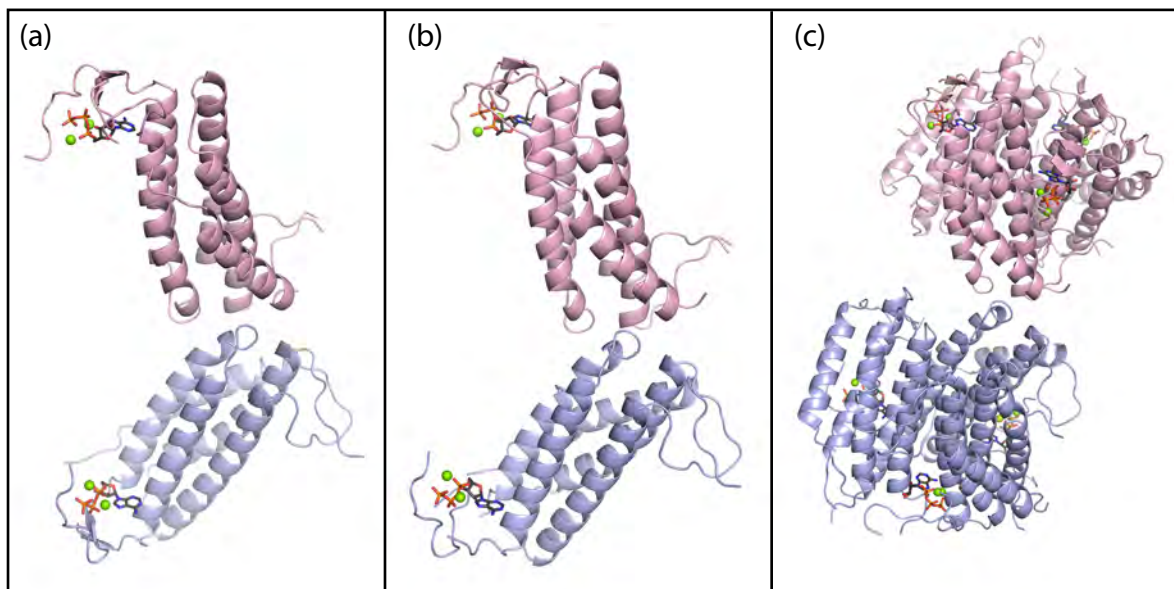

**Supplementary Figure 2.** Ribbon representations of the asymmetric unit in the *LrPduO* variant crystal structures. (a) The *LrPduO*<sup>D35N</sup> variant monomers, with monomer A in *blue* and monomer B in *pink*. (b) The *LrPduO*<sup>R132K</sup> variant monomers, with monomer A in *blue* and monomer B in *pink*. (c) The *LrPduO*<sup>R132K</sup> variant trimer structures, formed by crystallographic symmetry operations.
